# Supplementary figures and images for: Monitoring structural modulation of redox-sensitive proteins in cells with MS-CETSA
Source: PubMed Central journal article supplement — Redox Biol. 2019 Mar 14;24:101168. doi: 10.1016/j.redox.2019.101168 (PMC6439307; doi:10.1016/j.redox.2019.101168), 2019-03-14

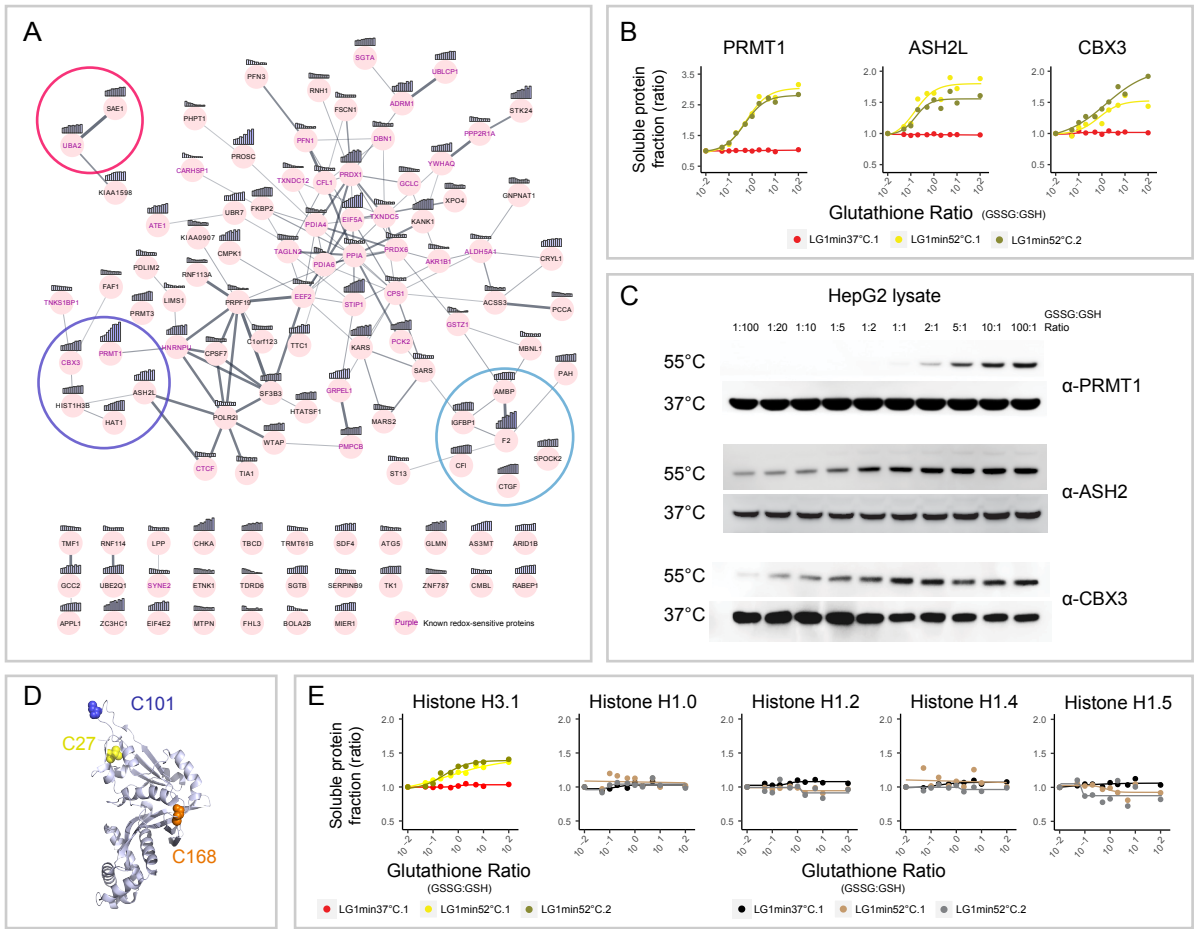

Supplementary Fig. 1

Supplement: mmc1.pdf [file mmc1.pdf]

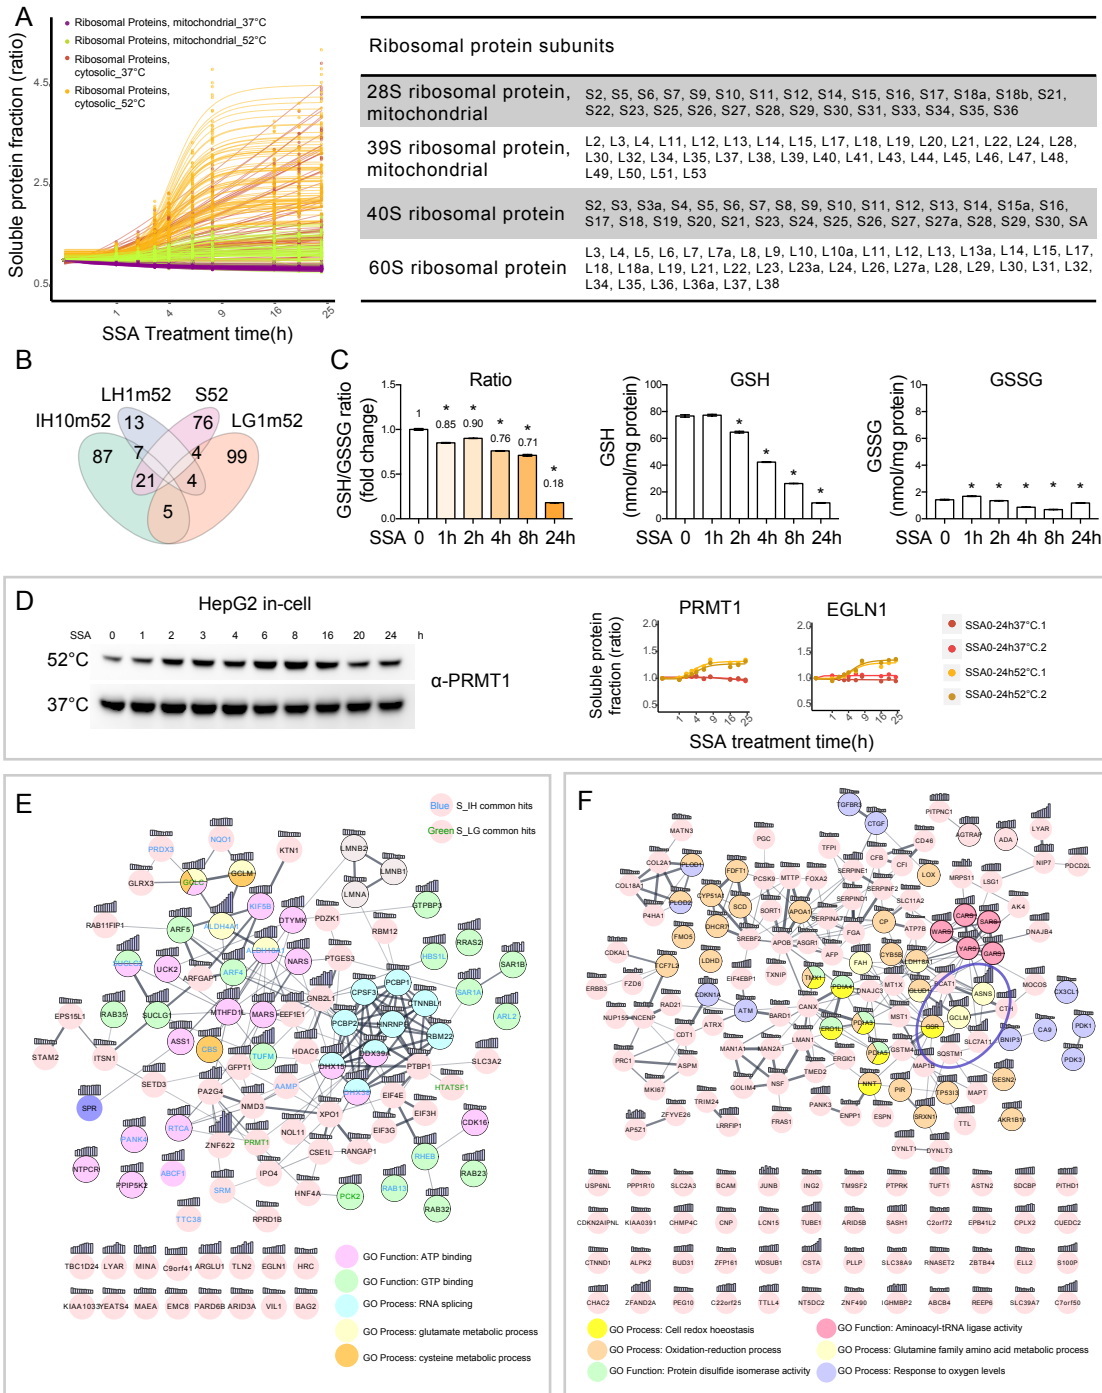

Supplementary Fig. 3

Supplement: mmc3.pdf [file mmc3.pdf]

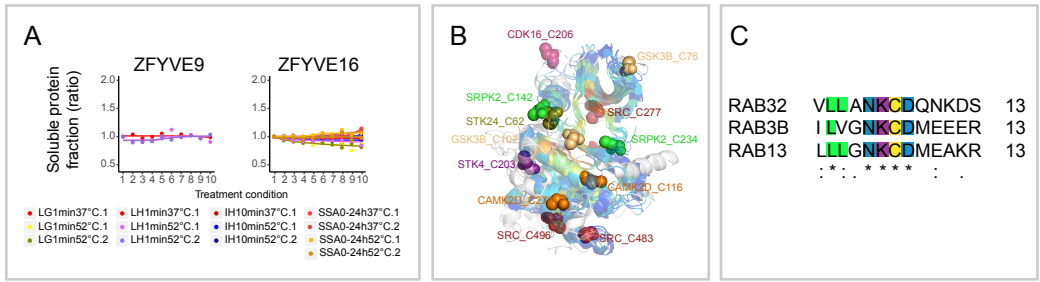

Supplementary Fig. 4

Supplement: mmc4.pdf [file mmc4.pdf]
